# Supplementary material
Source: publisher figshare collection journal article supplement (https://sage.figshare.com/ndownloader/files/19497296)
Supplement: Supplementary file 1 [file 19497296]

## Highlights

- Considering decision-making styles in a nurse scheduling problem.
- Considering nurses' satisfaction in the presented model.
- Developing three meta-heuristics (i.e., MOKA, NSGA-II, and MOTS) to solve the presented model.
- Using the DEA method to rank the Pareto solutions.
- Applying the proposed approach in a real case study.
